# Supplementary material for: Anti-biofilm Fe3O4@C18-[1,3,4]thiadiazolo[3,2-a]pyrimidin-4-ium-2-thiolate Derivative Core-shell Nanocoatings
Source: MDPI journal article supplement (doi:10.3390/ma13204640), 2020-10-17
Supplement: s1 [file s1]

Supplementary Materials

## Anti-biofilm Fe<sub>3</sub>O<sub>4</sub>@C<sub>18</sub>-[1,3,4]thiadiazolo[3,2-a]pyrimidin-4-ium-2-thiolate Derivative Core-shell Nanocoatings

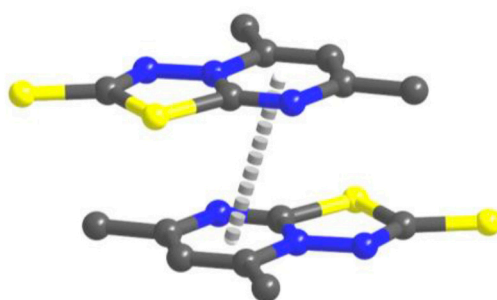

Figure S1. Supramolecular dimer of (1) in the solid state.

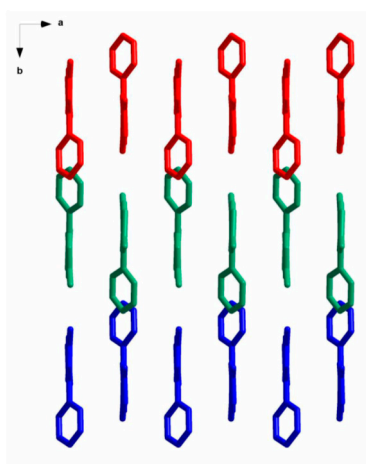

Figure S2. Crystal packing of (2) in the *ab* plane.

**Publisher's Note:** MDPI stays neutral with regard to jurisdictional claims in published maps and institutional affiliations.

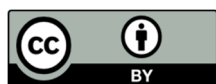

© 2020 by the authors. Submitted for possible open access publication under the terms and conditions of the Creative Commons Attribution (CC BY) license (<http://creativecommons.org/licenses/by/4.0/>).
